# Supplementary material for: Unilateral application of an external pneumatic compression therapy improves skin blood flow and vascular reactivity bilaterally
Source: PeerJ. 2018 May 29;6:e4878. doi: 10.7717/peerj.4878 (PMC5982998; doi:10.7717/peerj.4878)
Supplement: Supplemental Information 1 [file peerj-06-4878-s001.xlsx]

## Sheet: Ultrasound_FMD Data
ID	Age	Sex	Height_cm	Weight_kg	BMI	HR	RA_SBP	RA_DBP	LA_SBP	LA_DBP	Order	TL_RestiingDiameter_PRE	TL_RestingDiameter_POST	UTL_RestingDiameter_PRE	UTL_RestingDiameter_POST	TL_RestingSR_PRE	TL_RestingSR_POST	UTL_RestingSR_PRE	UTL_RestingSR_POST	TL_RestingBFV_PRE	TL_RestingBFV_POST	UTL_RestingBFV_PRE	UTL_BFV_POST	TL_RestingBF_PRE	TL_RestingBF_POST	UTL_RestingBF_PRE	UTL_RestingBF_POST	TL_MaxDiameter_PRE	TL_MaxDiameter_POST	UTL_MaxDiamter_PRE	UTL_MaxDiameter_POST	TL_aFMD_PRE	TL_aFMD_POST	UTL_aFMD_PRE	UTL_aFMD_POST	TL_pFMD_PRE	TL_pFMD2_POST	UTL_pFMD_PRE	UTL_pFMD2_POST	TL_TotalRHBF_PRE	TL_TotalRHBF_PRE	UTL_TotalRHBF_PRE	TL_TotalRHBF_POST	TL_MaxRHSR_PRE	TL_MaxRHSR_POST	UTL_MaxRHSR_PRE	UTL_MaxRHSR_POST	TL_MaxRHBFV_PRE	TL_MaxRHBFV_POST
1	28.7584	1	167.64	77.1818	27.4637	80	132	78	132	78	1	6.44	6.52	5.58	5.91	71	55	65	65	11.431	8.965	9.0675	9.60375	223.294	179.501	132.977	157.993	6.65	6.72	5.67	6.01	0.21	0.2	0.09	0.1	3.26087	3.06748	1.6129	1.69205	11938.4	12790.2	6828.89	3687.3	182	150	174	138	30.2575	25.2
2	25.41	1	165.1	70.3636	25.8139	62	100	70	108	78	2	6.01	5.94	5.46	5.52	68	68	69	61	10.217	10.098	9.4185	8.418	173.817	167.814	132.248	120.811	6.08	6.01	5.53	5.58	0.07	0.07	0.07	0.06	1.16473	1.17845	1.28205	1.08696	outlier/poor data				173	186	154	110	26.296	27.9465
3	22.6311	1	172.72	77.7273	26.0548	44	108	80	104	74	1	5.3	5.31	5.75	5.59	62	79	62	64	8.215	10.4872	8.9125	8.944	108.688	139.274	138.789	131.636	5.45	5.57	5.9	5.67	0.15	0.26	0.15	0.08	2.83019	4.89642	2.6087	1.43113	6281.09	4061.88	12473.1	10639.9	190	170	105	115	25.8875	23.6725
4	22.9925	1	182.88	109.091	32.6179	86	124	82	118	80	2	5.37	5.5	5.17	5.02	46	45	60	54	6.1755	6.1875	7.755	6.777	83.8768	88.158	97.6301	80.4388	5.48	5.63	5.21	5.12	0.11	0.13	0.04	0.1	2.04842	2.36364	0.773694	1.99203	3717.93	2803.42	8119.57	5800.53	99	96	230	107	13.563	13.512
5	33.1992	1	182.88	92.0455	27.5214	58	112	80	110	78	1	7.05	6.93	6.4	6.3	40	43	56	43	7.05	7.44975	8.96	6.7725	165.04	168.511	172.858	126.605	7.15	7.07	6.5	6.42	0.1	0.14	0.1	0.12	1.41844	2.0202	1.5625	1.90476	22886.9	6877.61	4145.5	4036.64	111	120	72	173	19.8413	21.21
6	33.1554	1	180.34	89.5455	27.5334	50	118	84	120	78	1	6.11	6.22	6.32	6.16	38	31	38	43	5.8045	4.8205	6.004	6.622	102.063	87.8403	112.952	118.351	6.27	6.37	6.43	6.25	0.16	0.15	0.11	0.09	2.61866	2.41158	1.74051	1.46104	8726.38	8285.32	8093.94	11276.4	158	106	136	153	24.7665	16.8805
7	24.0219	1	180.34	87.8182	27.0023	60	120	70	122	78	2	6.02	6.35	6.45	6.39	49	46	41	46	7.3745	7.3025	6.61125	7.3485	125.877	138.688	129.546	141.326	6.11	6.48	6.58	6.53	0.09	0.13	0.13	0.14	1.49502	2.04724	2.0155	2.19092	8526.24	16877.8	11204.1	11521.1	88	68	73	78	13.442	11.016
8	20.4353	1	170.18	55.7273	19.242	70	108	70	116	74	2	4.76	4.98	4.51	4.82	38	30	85	24	4.522	3.735	9.58375	2.892	48.2576	43.6285	91.8141	31.6456	4.84	5.07	4.6	4.92	0.08	0.09	0.09	0.1	1.68067	1.80723	1.99557	2.07469	4071.41	6365.4	2679.89	2784.81	112	280	264	57	13.552	35.49
9	31.269	1	185.42	99.9091	29.0597	54	122	64	122	68	2	6.13	5.99	5.97	6.11	50	52	58	58	7.6625	7.787	8.6565	8.8595	135.616	131.597	145.315	155.78	6.21	6.05	6.09	6.33	0.08	0.06	0.12	0.22	1.30506	1.00167	2.01005	3.60065	3035.1	2804.02	4612.51	4461.23	184	124	264	214	28.566	18.755
10	22.1273	2	170.18	86.2273	29.7733	56	120	80	122	70	2	3.82	3.67	3.76	3.71	68	59	67	68	6.494	5.41325	6.298	6.307	44.6334	34.3409	41.9372	40.8876	3.88	3.77	3.85	3.84	0.06	0.1	0.09	0.13	1.57068	2.7248	2.39362	3.50404	8774.4	3468.43	3731.78	5685.18	158	194	165	178	15.326	18.2845
11	30.9979	2	162.56	56.1818	21.2603	48	90	58	98	64	1	3.99	3.79	3.55	3.8	75	71	100	75	7.48125	6.72725	8.875	7.125	56.0972	45.5132	52.68	48.4588	4.09	3.86	3.64	3.99	0.1	0.07	0.09	0.19	2.50627	1.84697	2.53521	5	6279.89	2089.76	1149.48	4854.93	276	281	280	239	28.221	27.1165
12	23.0554	2	160.02	74.7273	29.183	58	104	64	102	68	1	5.57	5.64	5.11	5.25	52	51	56	50	7.241	7.191	7.154	6.5625	105.811	107.738	87.9856	85.194	5.65	5.81	5.25	5.36	0.08	0.17	0.14	0.11	1.43627	3.01418	2.73973	2.09524	6828.86	4408.8	5676.64	3518.51	268	109	166	104	37.855	15.8322
13	31.8686	2	172.72	63.1818	21.1791	61	98	64	102	64	2	5.28	5.08	4.41	4.51	71	69	64	64	9.372	8.763	7.056	7.216	123.061	106.513	64.6333	69.1306	5.41	5.24	4.51	4.62	0.13	0.16	0.1	0.11	2.46212	3.14961	2.26757	2.43902	8756.41	6205.52	4209.25	5883.66	192	142	166	173	25.968	18.602
14	19.6167	2	160.02	59.6364	23.2896	70	110	74	110	68	1	6	5.98	4.81	4.52	76	68	79	58	11.4	10.166	9.49975	6.554	193.298	171.227	103.52	63.0673	6.06	6.05	4.88	4.62	0.06	0.07	0.07	0.1	1	1.17057	1.4553	2.21239	10092.2	6977.52	8306.48	6592.22	195	126	234	162	29.5425	19.0575
15	22.5763	2	160.02	56.3636	22.0115	52	116	58	118	62	2	4.24	4.72	4.19	4.68	68	54	68	54	7.208	6.372	7.123	6.318	61.0334	66.8622	58.8995	65.1767	4.4	4.89	4.29	4.82	0.16	0.17	0.1	0.14	3.77358	3.60169	2.38663	2.99145	2836.26	3421.12	2385.43	3169.52	157	145	167	123	17.27	17.7263
16	21.8727	2	165.1	62.1818	22.8123	84	108	72	102	70	1	4.63	5.21	4.78	4.6	71	55	72	81	8.21825	7.16375	8.604	9.315	82.9779	91.5876	92.5928	92.8366	4.74	5.34	4.86	4.67	0.11	0.13	0.08	0.07	2.37581	2.4952	1.67364	1.52174	5088.53	4058.16	8004.13	3924.35	152	85	198	147	18.012	11.3475
17	22.5927	2	165.1	66.6364	24.4465	46	92	60	100	62	2	6.52	6.61	5.91	5.89	38	38	49	39	6.194	6.2795	7.23975	5.74275	124.019	129.226	119.102	93.8364	6.58	6.72	5.96	5.98	0.06	0.11	0.05	0.09	0.920245	1.66415	0.846024	1.52801	4543	5801.55	5033.89	4215.42	73	59	97	61	12.0085	9.912
18	21.859	2	162.56	66.3636	25.1132	80	110	68	116	70	1	4.14	4.31	4	4.15	66	82	73	65	6.831	8.8355	7.3	6.74375	55.145	77.3048	55.0128	54.7039	4.26	4.42	4.08	4.3	0.12	0.11	0.08	0.15	2.89855	2.5522	2	3.61446	2195.77	1741.06	2859.16	1657.11	99	147	157	121	10.5435	16.2435
RA=right arm
LA=left arm
SBP=systolic blood pressure
DBP=diastolic blood pressure
TL=treated leg
UTL=untreated leg
SR=shear rate
BFV=blood flow velocity
BF=blood flow
aFMD= absolute flow mediated dilation
pFMD=percent(relative) flow mediated dilation
RH=reactive hyperemia
AUC=area under curve
nFMD=flow mediation dilation normalized to shear rate area under the curve to peak dilation
[truncated: 18 more columns]

## Sheet: Thermography_MST Data
sub_id	group	Sex	Age	Height_cm	Weight_kg	BMI	RSBP	RDBP	LSBP	LDBP	T_Th_PRE	UT_Th_PRE	T_LL_PRE	UT_LL_PRE	UT_Th_T15	UT_LL_T15	T_Th_R0	UT_Th_R0	T_LL_R0	UT_LL_R0	T_Th_R30	UT_Th_R30	T_LL_R30	UT_LL_R30	T_Th_R60	UT_Th_R60	T_LL_R60	UT_LL_R60
21	1	1	28.7584	167.64	77.1818	27.4637	132	78	132	78	29.9	30.18	30.45	30.09	31.76	31.2005	32.85	31.5	32.78	31.01	31.61	30.98	31.18	30.83	31.14	30.79	30.7	30.51
22	1	1	25.41	165.1	70.3636	25.8139	100	70	108	78	32.1	32.41	32.44	32.71	32.72	32.5315	33.68	32.99	32.76	32.48	32.91	33.29	32.23	32.5	31.95	32.36	31.5	31.26
23	1	1	22.6311	172.72	77.7273	26.0548	108	80	104	74	29.4	30.76	30.76	30.29	30.49	30.7375	31.26	31.54	31.54	30.71	31.11	30.66	30.66	30.48	30.68	30.68	30.68	30.46
24	1	1	22.9925	182.88	109.091	32.6179	124	82	118	80	30.29	30.49	30.509	29.9	31.41	31.1065	32.11	31.43	31.5176	31.18	31.41	31.51	30.6271	30.9	30.91	31.16	30.202	30.71
25	1	1	33.1992	182.88	92.0455	27.5214	112	80	110	78	31.34	31.43	31.29	31.88	32.045	31.981	33.16	31.8	32.5	31.86	32.51	32.21	31.88	32.06	32.19	32.04	31.61	31.93
26	1	2	22.1273	170.18	86.2273	29.7733	120	80	122	70	29.6	29.78	30.2	30.34	31.425	31.15	31.83	31.24	31.83	30.69	31.54	31.3	30.84	30.59	31.2	30.98	30.3	30.15
27	1	1	24.0219	180.34	87.8182	27.0023	120	70	122	78	31.85	31.61	31.99	32.03	32.43	31.6815	33.25	32.26	32.54	31.6	32.83	32.28	31.8	31.51	32.55	32.41	31.35	31.29
28	2	2	22.5927	165.1	66.6364	24.4465	92	60	102	62	30.5	30.75	31.13	31.01	30.775	30.7005	32.21	30.66	31.99	30.43	30.83	30.28	30.28	29.8	30.35	29.95	29.8	29.39
29	2	2	21.859	162.56	66.3636	25.1132	110	68	116	70	30.24	30.05	30.71	30.84	29.819	30.3005	31.93	30.08	31.81	30.74	30.74	30.45	30.93	30.95	30.56	30.4	30.73	30.68
30	2	1	31.269	185.42	99.9091	29.0597	122	64	122	68	30.44	30.29	31.38	31.53	30.2565	31.0565	31.61	30.31	32.05	30.99	30.75	30.29	31.15	30.83	30.49	30.2	30.61	30.61
31	2	1	33.1554	180.34	89.5455	27.5334	118	84	120	78	30.1	29.8	30.54	30.5	30.0685	30.438	31.66	29.84	31.73	30.08	30.1	29.51	29.88	29.4	29.76	29.26	29.8	29.14
32	2	2	30.9979	162.56	56.1818	21.2603	98	64	102	64	30.74	30.61	30.73	30.91	30.2315	30.775	31.49	30.11	31.64	30.7	30.61	30.48	30.2	30.14	30.29	30.23	29.71	29.66
33	2	1	22.8747	172.72	81.8182	27.4261	120	76	126	78	30.63	30.86	31.21	31.4	30.7875	31.0005	32.35	30.69	32.21	30.76	30.88	30.29	30.48	30.28	30.2	29.84	29.94	30.2
34	2	1	20.8734	182.88	99.0909	29.6279	136	82	134	84	31.53	31.33	32.61	32.53	31.3935	32.088	32.5	31.28	32.93	31.95	31.8	31.4	31.85	31.73	31.4	31.1	31.06	31
Group
1=EPC
2=Sham
T=treated leg
UT=untreated leg
Th=thigh
LL=lower-leg
PRE=baseline time point
T15=mid-point of treatment time point
R0=immediately following treatment time point
R30=30-min following treatment time point
R60=60-min following treatment time point
Data are in degrees Celcius for mean skin temperature (MST)
